# Supplementary material for: Fabrication of dual-phase TiO2/WO3 with post-illumination photocatalytic memory
Source: Royal Society of Chemistry journal article supplement (doi:10.1039/d0nj04694a), 2020-01-01
Supplement: d0nj04694a1.pdf [file d0nj04694a1.pdf]

Supplementary information

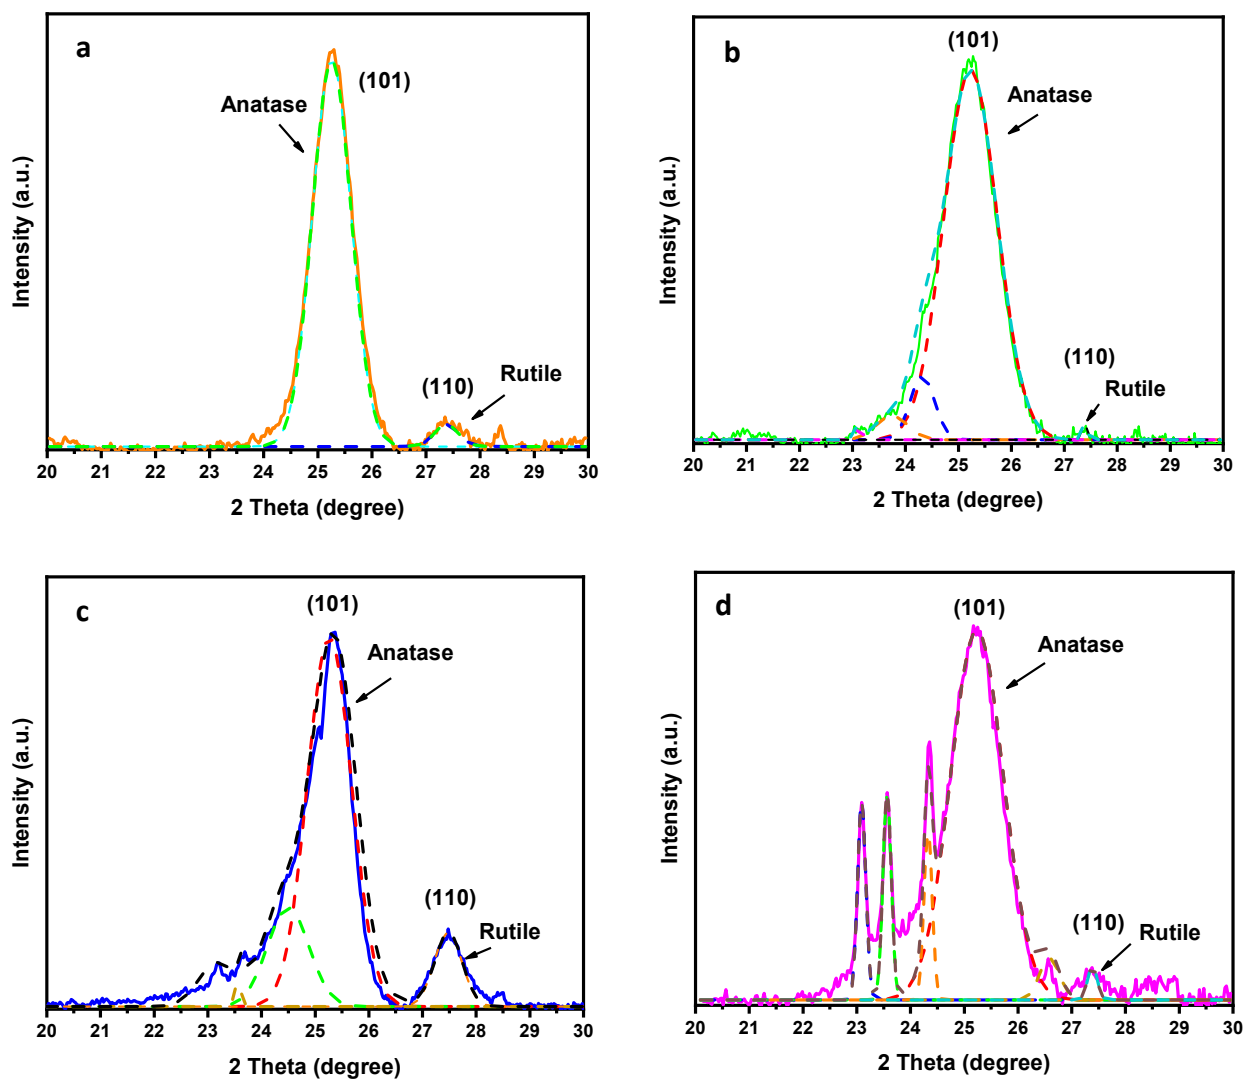

Fig. S1. The anatase (101) and rutile (110) peaks for a) G:TiO<sub>2</sub>, b) G:TiO<sub>2</sub>/WO<sub>3</sub> (90:10), c) G:TiO<sub>2</sub>/WO<sub>3</sub> (80:20), and d) G:TiO<sub>2</sub>/WO<sub>3</sub> (70:30).
